# Supplementary material for: Double-Clad Antiresonant Hollow-Core Fiber and Its Comparison with Other Fibers for Multiphoton Micro-Endoscopy
Source: MDPI journal article supplement (doi:10.3390/s24082482), 2024-04-12
Supplement: s1 [file s1]

## *Supplementary information*

### **Double Clad Antiresonant Hollow Core Fiber and Its Comparison with other Fibres for Multiphoton Micro-Endoscopy**

Marzanna Sz waj<sup>1,2,3</sup> , Ian A Davidson<sup>1</sup>, Peter Johnson<sup>2,3</sup>, Gregory Jasion<sup>1</sup>, Yongmin Jung<sup>1</sup>, Seyed Reza Sandoghchi <sup>1</sup>, Krzysztof Herdzik<sup>1,2,3</sup>, Konstantinos Bourdakos<sup>2,3</sup>, Natalie V. Wheeler<sup>1</sup>, Hans Christian Mulvad<sup>1</sup>, David J Richardson<sup>1</sup>, Francesco Poletti<sup>1\*</sup>, Sumeet Mahajan<sup>2,3\*</sup>

<sup>1</sup>*Optoelectronics Research Centre, University of Southampton, SO17 1BJ, UK*

<sup>2</sup>*Institute for Life Sciences, University of Southampton, SO17 1BJ, UK*

<sup>3</sup>*School of Chemistry, University of Southampton, SO17 1BJ, UK*

*\*frap@orc.soton.ac.uk*

*\*S.Mahajan@soton.ac.uk*

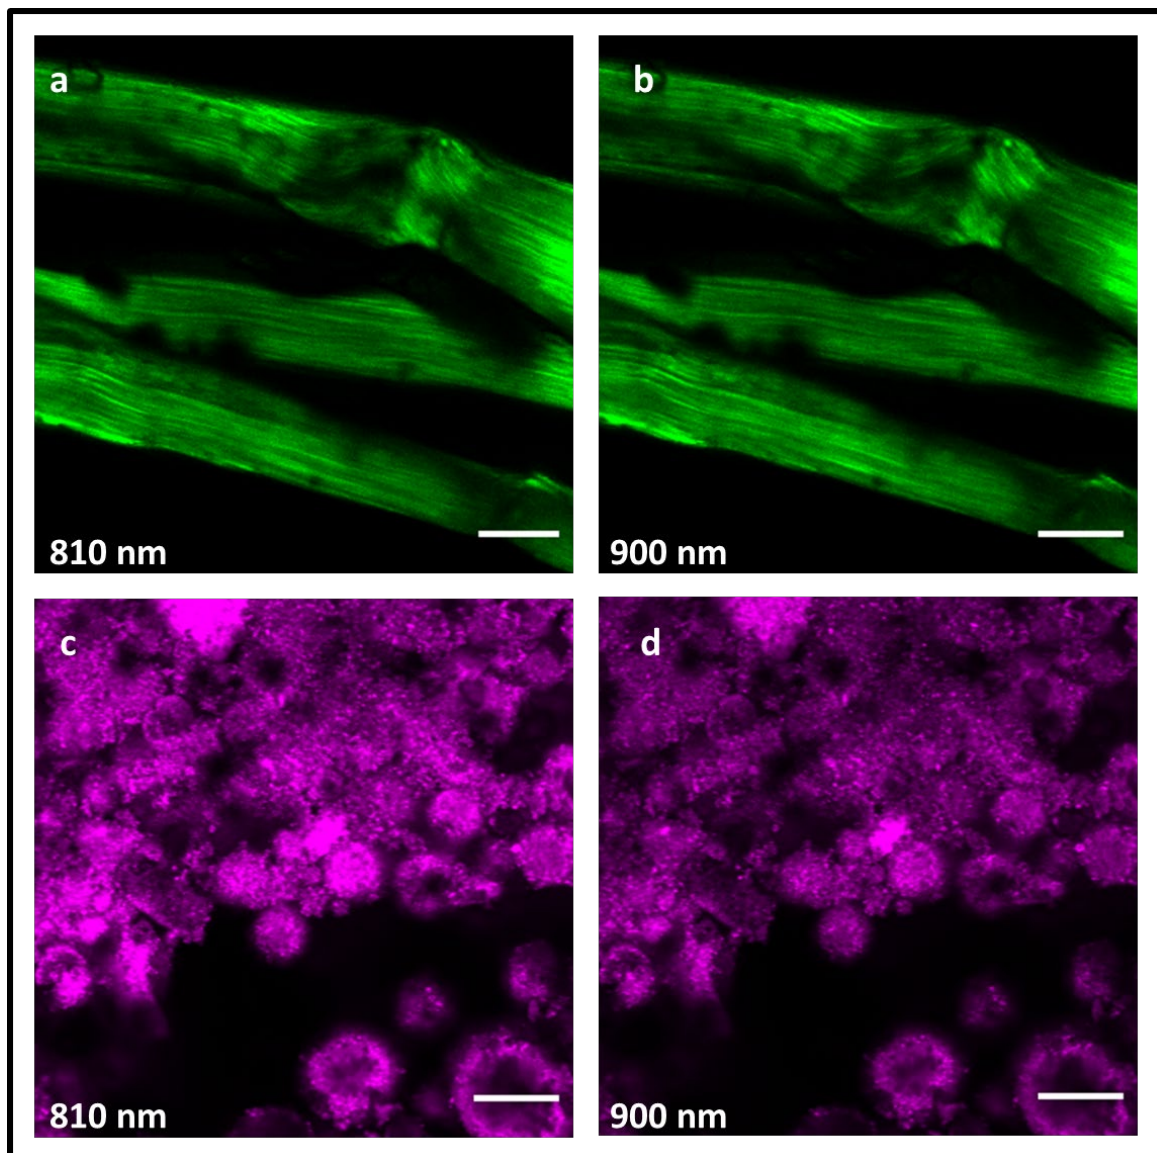

**Fig. S1 Mouse tail tendon and barium titanate nano-crystals images using free-space laser propagation.** The images of mouse tail tendon (a, b) and barium titanate crystal (c, d) captured using a free-space laser propagation at 810 nm and 900 nm excitation wavelength (20x objective, zoom 3, 341 pixels x 341 pixels, 10.7  $\mu$ s dwell time,  $\sim$  20 mW power). Scale bar = 50  $\mu$ m.

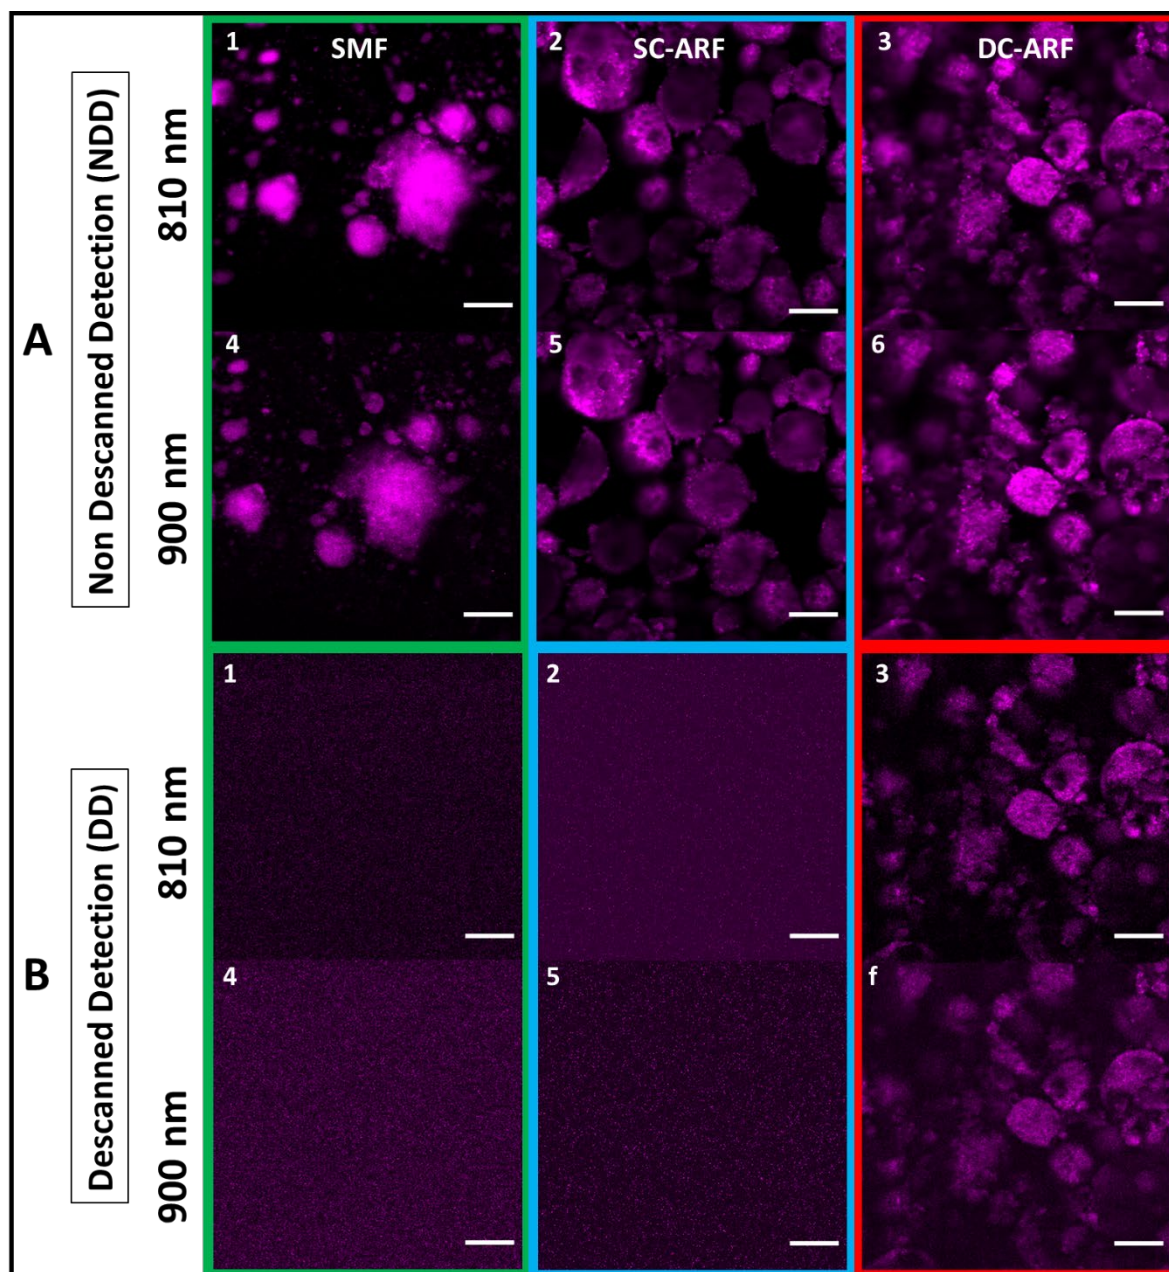

**Fig. S2 SHG images of Barium titanate nano-crystals with all fibers in non-descanned and descanned configurations.** The images of barium titanate crystal taken using NDD A (1-6) and DD B (1-6) configuration 1 meter long SCF, SC-ARF and DC-ARF at 810 nm and 900 nm excitation wavelength (NDD: 20x objective, zoom 3, 341 pixels x 341 pixels, 10.7  $\mu$ s dwell time, ~20 mW power; DD: 20x objective, zoom 3, 341 pixels, 27  $\mu$ s dwell time, ~ 20 mW power, average 10 frames). Scale bar = 50  $\mu$ m.



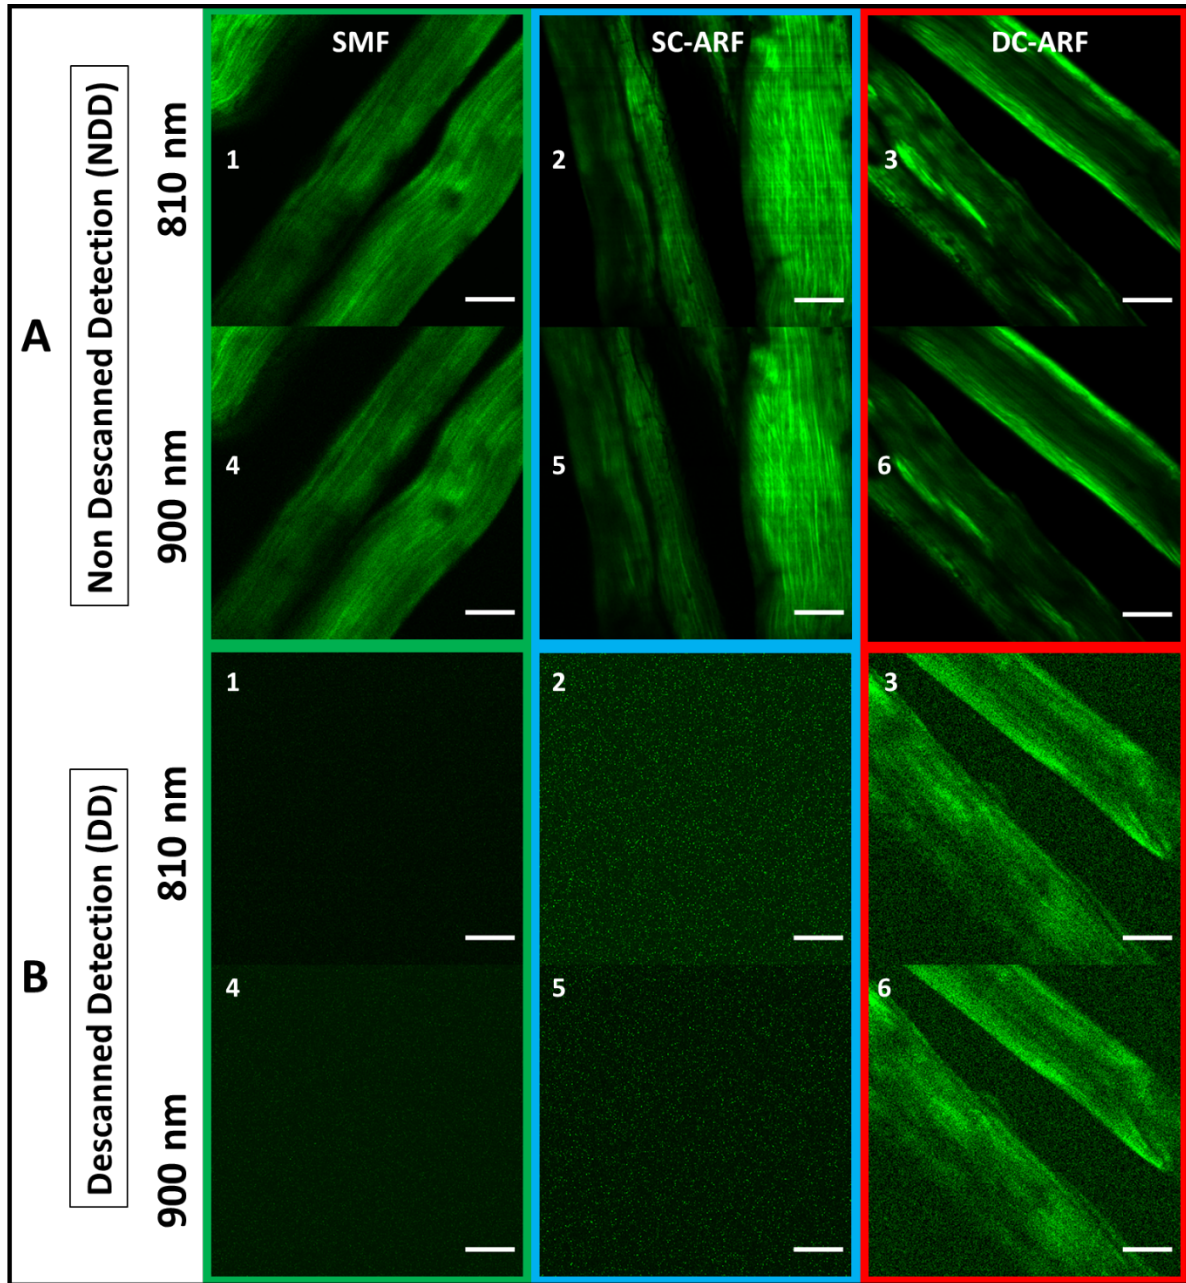

**Fig. S3 SHG images of mouse tail tendon with all fibers of 1 m length in non-descanned and descanned configurations.** The images of mouse tail tendon taken using NDD **A (1-6)** and DD **B (1-6)** configuration ( with their schematic representation) for 1 meter long SCF, SC-ARF and DC-ARF at 810 nm and 900 nm excitation wavelength (NDD: 20x objective, zoom 3, 341 pixels x 341 pixels, 10.7  $\mu\text{s}$  dwell time,  $\sim 20$  mW power; DD: 20x objective, zoom 3, 341 pixels x 341 pixels, 27  $\mu\text{s}$  dwell time,  $\sim 20$  mW power, average 10 frames). Scale bar = 50  $\mu\text{m}$ .

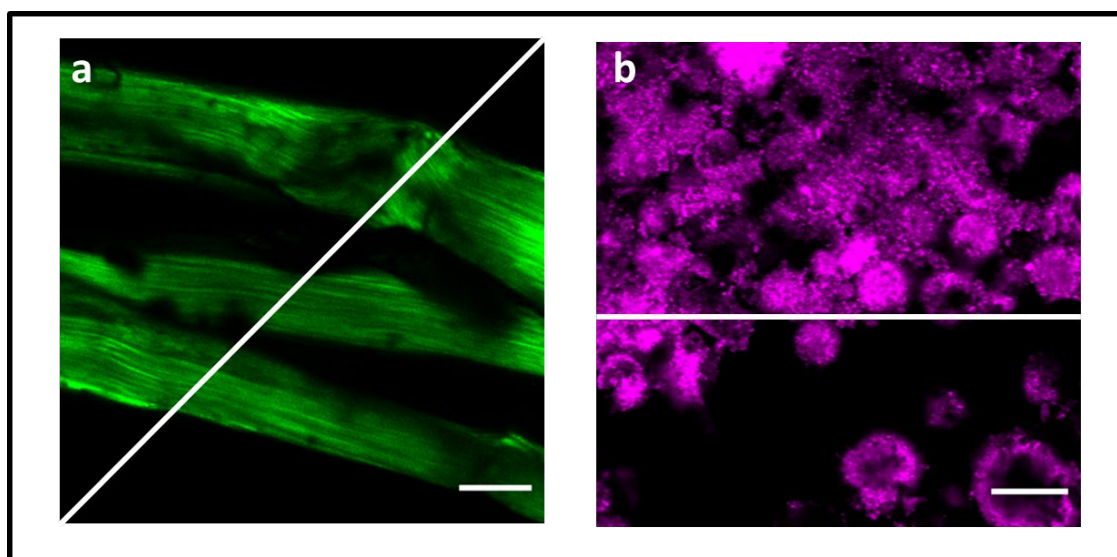

**Fig. S4 Line profile examples.** Example of mouse tail (a) and barium titanate crystal (b) images with the line profiles used in Fig. 5 and S4 respectively. Line profiles were taken across areas that had both the sample as well as some blank areas.

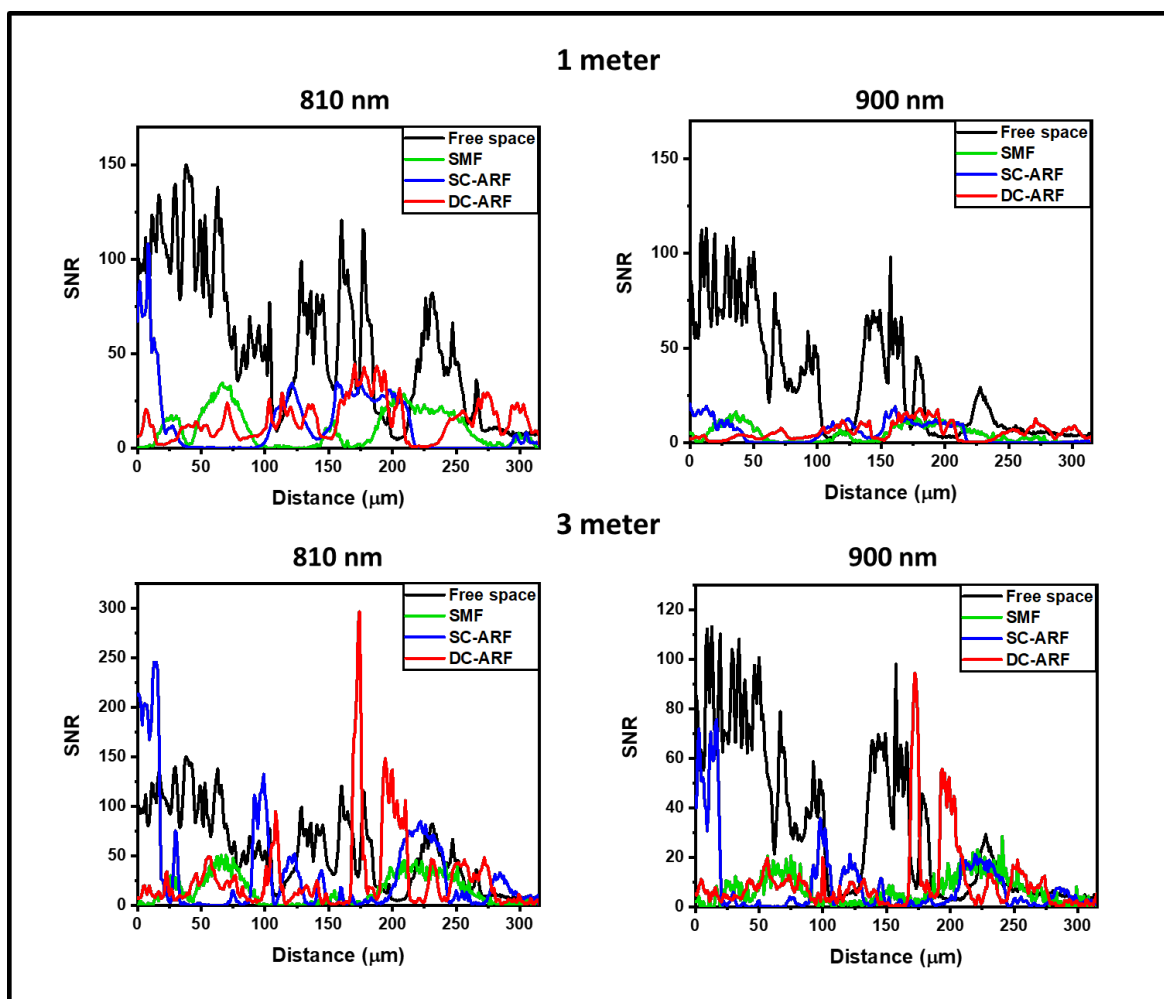

**Fig. S5 Average SNR vs distance plots.** These profiles were obtained for 1 and 3 m SCF, SC-ARF, and DC-ARF in NDD compared with the imaging configuration with a free-space laser coupled. These SNR profiles are calculated for images of a barium titanate nanocrystal sample.

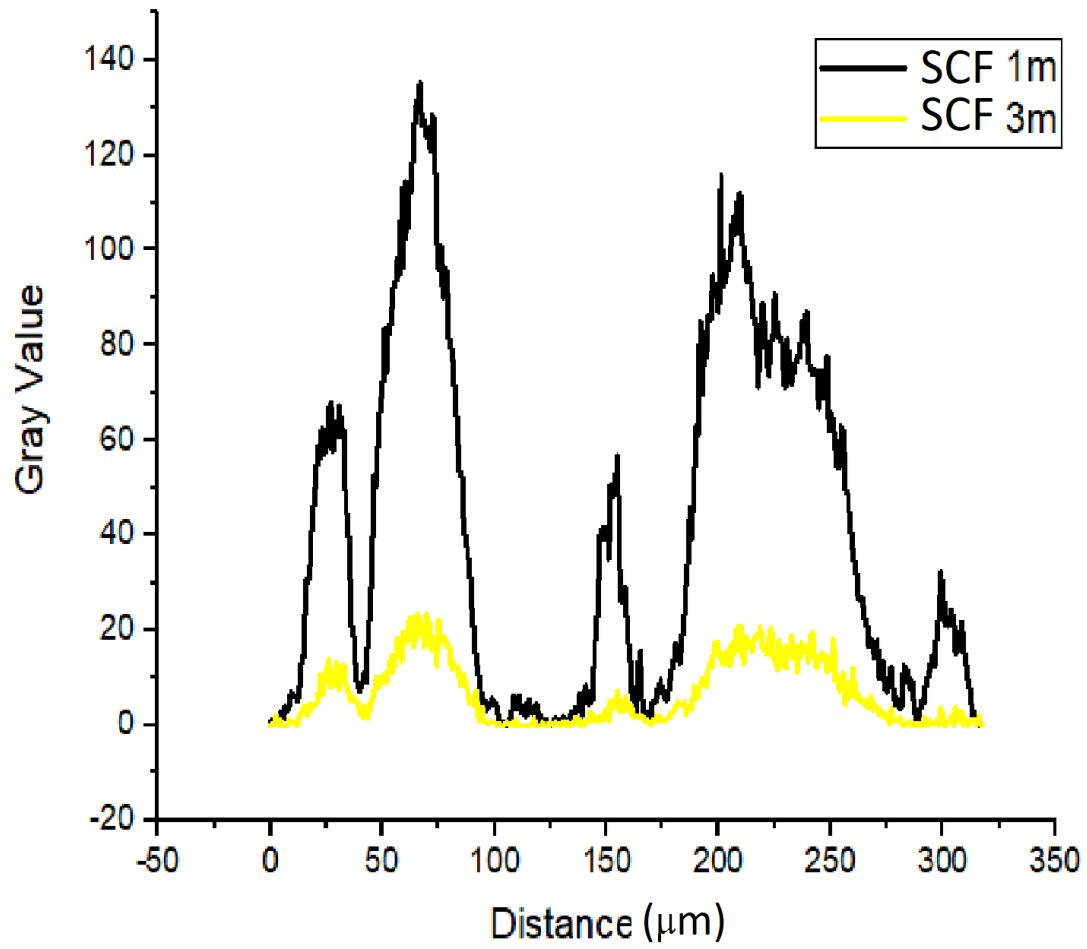

**Fig. S6 Signal profiles for SCF.** Signal intensities over a line profile of the same image for a 1 and a 3 m SCF. The signals decrease approximately 7 times due to anomalous GVD and non-linearity. The images were collected in the NDD configuration.

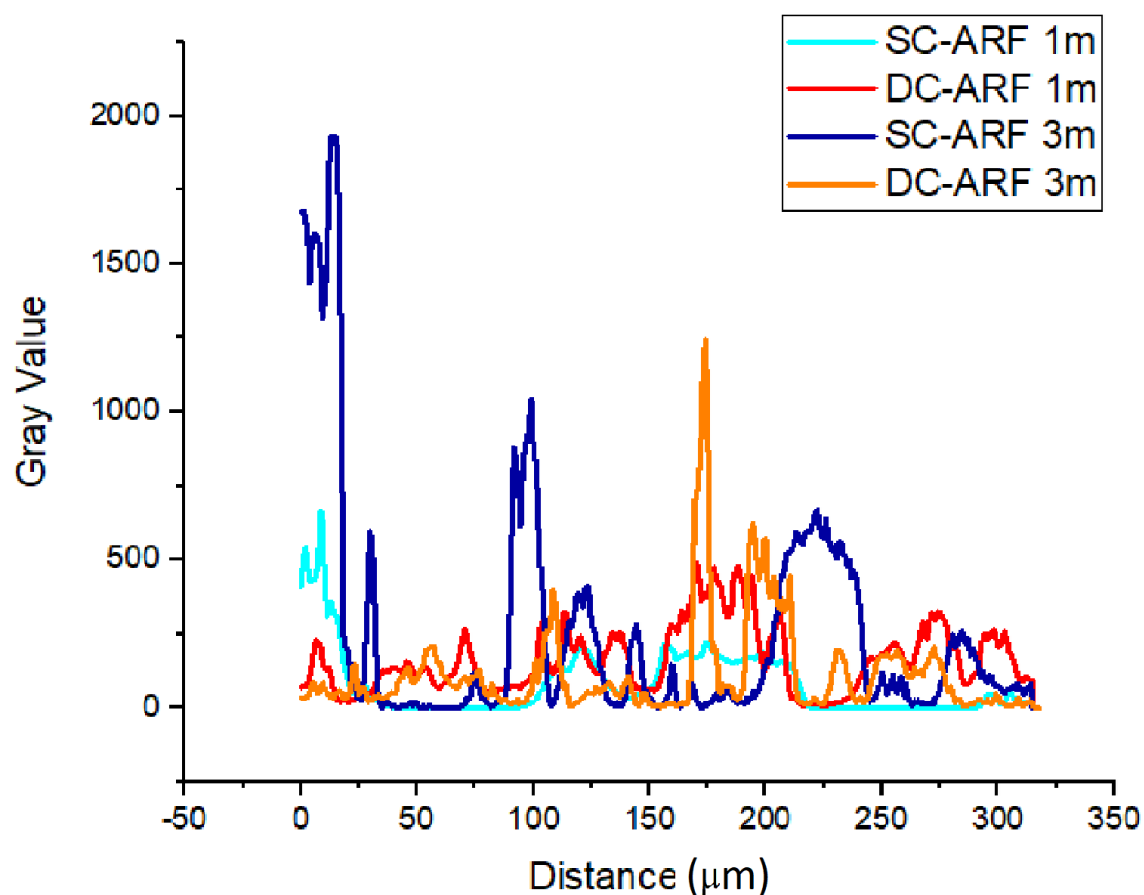

**Fig. S7 Signal profiles for SC-ARF and DC-ARF.** Signal intensities over a line profile of approximately the same imaging area (due to alignment issues the image was not exactly the same) for a 1 and a 3 m SC-ARF and DC-ARF. The signals are of approximately similar levels between the two lengths in either of the fibers. The images were collected in the NDD configuration.
